# Supplementary material for: Insights into the behaviour of systems biology models from dynamic sensitivity and identifiability analysis: a case study of an NF-κB signalling pathway
Source: Royal Society of Chemistry journal article supplement (doi:10.1039/b609442b), 2006-10-23
Supplement: b609442b.pdf [file b609442b.pdf]

Supplementary Material (ESI) for Molecular BioSystems  
 This journal is (c) The Royal Society of Chemistry 2006

| Index | Reactions                                                                                     | Description                                                                | Values                | Units               |
|-------|-----------------------------------------------------------------------------------------------|----------------------------------------------------------------------------|-----------------------|---------------------|
| 1     | $I\kappa B\alpha + NF-\kappa B \rightarrow I\kappa B\alpha-NF-\kappa B$                       | $I\kappa B\alpha-NF-\kappa B$ association                                  | $0.5\_10^0$           | $\mu M^{-1} s^{-1}$ |
| 2     | $I\kappa B\alpha-NF-\kappa B \rightarrow NF-\kappa B + I\kappa B\alpha$                       | $I\kappa B\alpha-NF-\kappa B$ dissociation                                 | $0.5 \times 10^{-3}$  | $s^{-1}$            |
| 3     | $I\kappa B\beta + NF-\kappa B \rightarrow I\kappa B\beta-NF-\kappa B$                         | $I\kappa B\beta-NF-\kappa B$ association                                   | $0.5\_10^0$           | $\mu M^{-1} s^{-1}$ |
| 4     | $I\kappa B\beta-NF-\kappa B \rightarrow NF-\kappa B + I\kappa B\beta$                         | $I\kappa B\beta-NF-\kappa B$ dissociation                                  | $0.5 \times 10^{-3}$  | $s^{-1}$            |
| 5     | $I\kappa B\epsilon + NF-\kappa B \rightarrow I\kappa B\epsilon-NF-\kappa B$                   | $I\kappa B\epsilon-NF-\kappa B$ association                                | $0.5\_10^0$           | $\mu M^{-1} s^{-1}$ |
| 6     | $I\kappa B\epsilon-NF-\kappa B \rightarrow NF-\kappa B + I\kappa B\epsilon$                   | $I\kappa B\epsilon-NF-\kappa B$ dissociation                               | $0.5 \times 10^{-3}$  | $s^{-1}$            |
| 7     | $IKK I\kappa B\alpha + NF-\kappa B \rightarrow IKK I\kappa B\alpha-NF-\kappa B$               | $IKK I\kappa B\alpha-NF-\kappa B$ association                              | $0.5\_10^0$           | $\mu M^{-1} s^{-1}$ |
| 8     | $IKK I\kappa B\alpha-NF-\kappa B \rightarrow NF-\kappa B + IKK I\kappa B\alpha$               | $IKK I\kappa B\alpha-NF-\kappa B$ dissociation                             | $0.5 \times 10^{-3}$  | $s^{-1}$            |
| 9     | $IKK I\kappa B\alpha-NF-\kappa B \rightarrow IKK + NF-\kappa B$                               | $IKK I\kappa B\alpha-NF-\kappa B$ catalysis                                | $2.04 \times 10^{-2}$ | $s^{-1}$            |
| 10    | $IKK I\kappa B\beta + NF-\kappa B \rightarrow IKK I\kappa B\beta-NF-\kappa B$                 | $IKK I\kappa B\beta-NF-\kappa B$ association                               | $0.5\_10^0$           | $\mu M^{-1} s^{-1}$ |
| 11    | $IKK I\kappa B\beta-NF-\kappa B \rightarrow NF-\kappa B + IKK I\kappa B\beta$                 | $IKK I\kappa B\beta-NF-\kappa B$ dissociation                              | $0.5 \times 10^{-3}$  | $s^{-1}$            |
| 12    | $IKK I\kappa B\beta-NF-\kappa B \rightarrow IKK + NF-\kappa B$                                | $IKK I\kappa B\beta-NF-\kappa B$ catalysis                                 | $7.5 \times 10^{-3}$  | $s^{-1}$            |
| 13    | $IKK I\kappa B\epsilon + NF-\kappa B \rightarrow IKK I\kappa B\epsilon-NF-\kappa B$           | $IKK I\kappa B\epsilon-NF-\kappa B$ association                            | $0.5\_10^0$           | $\mu M^{-1} s^{-1}$ |
| 14    | $IKK I\kappa B\epsilon-NF-\kappa B \rightarrow NF-\kappa B + IKK I\kappa B\epsilon$           | $IKK I\kappa B\epsilon-NF-\kappa B$ dissociation                           | $0.5 \times 10^{-3}$  | $s^{-1}$            |
| 15    | $IKK I\kappa B\epsilon-NF-\kappa B \rightarrow IKK + NF-\kappa B$                             | $IKK I\kappa B\epsilon-NF-\kappa B$ catalysis                              | $1.1 \times 10^{-2}$  | $s^{-1}$            |
| 16    | $I\kappa B\alpha-NF-\kappa B \rightarrow NF-\kappa B$                                         | constitutive $I\kappa B\alpha$ degradation (complexed to $NF-\kappa B$ )   | $2.25 \times 10^{-5}$ | $s^{-1}$            |
| 17    | $I\kappa B\beta-NF-\kappa B \rightarrow NF-\kappa B$                                          | constitutive $I\kappa B\beta$ degradation (complexed to $NF-\kappa B$ )    | $2.25 \times 10^{-5}$ | $s^{-1}$            |
| 18    | $I\kappa B\epsilon-NF-\kappa B \rightarrow NF-\kappa B$                                       | constitutive $I\kappa B\epsilon$ degradation (complexed to $NF-\kappa B$ ) | $2.25 \times 10^{-5}$ | $s^{-1}$            |
| 19    | $NF-\kappa B \rightarrow NF-\kappa B_n$                                                       | $NF-\kappa B$ nuclear import                                               | $0.9 \times 10^{-1}$  | $s^{-1}$            |
| 20    | $NF-\kappa B_n \rightarrow NF-\kappa B$                                                       | $NF-\kappa B$ nuclear export                                               | $0.8 \times 10^{-4}$  | $s^{-1}$            |
| 21    | $I\kappa B\alpha_n + NF-\kappa B_n \rightarrow I\kappa B\alpha_n-NF-\kappa B_n$               | $I\kappa B\alpha-NF-\kappa B$ nuclear association                          | $0.5\_10^0$           | $\mu M^{-1} s^{-1}$ |
| 22    | $I\kappa B\alpha_n-NF-\kappa B_n \rightarrow NF-\kappa B_n + I\kappa B\alpha_n$               | $I\kappa B\alpha-NF-\kappa B$ nuclear dissociation                         | $0.5 \times 10^{-3}$  | $s^{-1}$            |
| 23    | $I\kappa B\beta_n + NF-\kappa B_n \rightarrow I\kappa B\beta_n-NF-\kappa B_n$                 | $I\kappa B\beta-NF-\kappa B$ nuclear association                           | $0.5\_10^0$           | $\mu M^{-1} s^{-1}$ |
| 24    | $I\kappa B\beta_n-NF-\kappa B_n \rightarrow NF-\kappa B_n + I\kappa B\beta_n$                 | $I\kappa B\beta-NF-\kappa B$ nuclear dissociation                          | $0.5 \times 10^{-3}$  | $s^{-1}$            |
| 25    | $I\kappa B\epsilon_n + NF-\kappa B_n \rightarrow I\kappa B\epsilon_n-NF-\kappa B_n$           | $I\kappa B\epsilon-NF-\kappa B$ nuclear association                        | $0.5\_10^0$           | $\mu M^{-1} s^{-1}$ |
| 26    | $I\kappa B\epsilon_n-NF-\kappa B_n \rightarrow NF-\kappa B_n + I\kappa B\epsilon_n$           | $I\kappa B\epsilon-NF-\kappa B$ nuclear dissociation                       | $0.5 \times 10^{-3}$  | $s^{-1}$            |
| 27    | source $\rightarrow I\kappa B\alpha_t$                                                        | $I\kappa B\alpha$ constitutive mRNA synthesis                              | $1.54 \times 10^{-6}$ | $\mu M^{-1} s^{-1}$ |
| 28    | $NF-\kappa B_n + NF-\kappa B_n \rightarrow I\kappa B\alpha_t + NF-\kappa B_n + NF-\kappa B_n$ | $I\kappa B\alpha$ inducible mRNA synthesis                                 | $1.65 \times 10^{-2}$ | $\mu M^{-1} s^{-1}$ |
| 29    | $I\kappa B\alpha_t \rightarrow sink$                                                          | $I\kappa B\alpha$ mRNA degradation                                         | $2.8 \times 10^{-4}$  | $s^{-1}$            |
| 30    | source $\rightarrow I\kappa B\beta_t$                                                         | $I\kappa B\beta$ constitutive mRNA synthesis                               | $1.78 \times 10^{-7}$ | $\mu M^{-1} s^{-1}$ |
| 31    | $I\kappa B\beta_t \rightarrow sink$                                                           | $I\kappa B\beta$ mRNA degradation                                          | $2.8 \times 10^{-4}$  | $s^{-1}$            |
| 32    | source $\rightarrow I\kappa B\epsilon_t$                                                      | $I\kappa B\epsilon$ constitutive mRNA synthesis                            | $1.27 \times 10^{-7}$ | $\mu M^{-1} s^{-1}$ |
| 33    | $I\kappa B\epsilon_t \rightarrow sink$                                                        | $I\kappa B\epsilon$ mRNA degradation                                       | $2.8 \times 10^{-4}$  | $s^{-1}$            |
| 34    | $IKK + I\kappa B\alpha \rightarrow IKK I\kappa B\alpha$                                       | $IKK-I\kappa B\alpha$ association                                          | $22.5 \times 10^{-3}$ | $\mu M^{-1} s^{-1}$ |
| 35    | $IKK I\kappa B\alpha \rightarrow IKK + I\kappa B\alpha$                                       | $IKK-I\kappa B\alpha$ dissociation                                         | $1.25 \times 10^{-3}$ | $s^{-1}$            |
| 36    | $I\kappa B\alpha_t \rightarrow I\kappa B\alpha + I\kappa B\alpha_t$                           | constitutive $I\kappa B\alpha$ translation rate                            | $4.08 \times 10^{-3}$ | $s^{-1}$            |
| 37    | $I\kappa B\alpha \rightarrow sink$                                                            | constitutive $I\kappa B\alpha$ degradation (free)                          | $1.13 \times 10^{-4}$ | $s^{-1}$            |
| 38    | $I\kappa B\alpha \rightarrow I\kappa B\alpha_n$ (Import)                                      | $I\kappa B\alpha$ nuclear import                                           | $3 \times 10^{-4}$    | $s^{-1}$            |
| 39    | $I\kappa B\alpha_n \rightarrow I\kappa B\alpha$ (Export)                                      | $I\kappa B\alpha$ nuclear export                                           | $2 \times 10^{-4}$    | $s^{-1}$            |
| 40    | $IKK + I\kappa B\beta \rightarrow IKK I\kappa B\beta$                                         | $IKK-I\kappa B\beta$ association                                           | $6.0 \times 10^{-3}$  | $\mu M^{-1} s^{-1}$ |
| 41    | $IKK I\kappa B\beta \rightarrow IKK + I\kappa B\beta$                                         | $IKK-I\kappa B\beta$ dissociation                                          | $1.75 \times 10^{-3}$ | $s^{-1}$            |
| 42    | $I\kappa B\beta_t \rightarrow I\kappa B\beta + I\kappa B\beta_t$                              | constitutive $I\kappa B\beta$ translation rate                             | $4.08 \times 10^{-3}$ | $s^{-1}$            |
| 43    | $I\kappa B\beta \rightarrow sink$                                                             | constitutive $I\kappa B\beta$ degradation (free)                           | $1.13 \times 10^{-4}$ | $s^{-1}$            |

| Index | Reactions                                                                                  | Description                                          | Values                | Units               |
|-------|--------------------------------------------------------------------------------------------|------------------------------------------------------|-----------------------|---------------------|
| 44    | $I\kappa B\beta \rightarrow I\kappa B\beta_n$ (Import)                                     | $I\kappa B\beta$ nuclear import                      | $1.5 \times 10^{-4}$  | $s^{-1}$            |
| 45    | $I\kappa B\beta_n \rightarrow I\kappa B\beta$ (Export)                                     | $I\kappa B\beta$ nuclear export                      | $1 \times 10^{-4}$    | $s^{-1}$            |
| 46    | $IKK + I\kappa B\epsilon \rightarrow IKKI\kappa B\epsilon$                                 | IKK- $I\kappa B\epsilon$ association                 | $9.0 \times 10^{-3}$  | $\mu M^{-1} s^{-1}$ |
| 47    | $IKKI\kappa B\epsilon \rightarrow IKK + I\kappa B\epsilon$                                 | IKK- $I\kappa B\epsilon$ dissociation                | $1.75 \times 10^{-3}$ | $s^{-1}$            |
| 48    | $I\kappa B\epsilon_{-t} \rightarrow I\kappa B\epsilon + I\kappa B\epsilon_{-t}$            | constitutive $I\kappa B\epsilon$ translation rate    | $4.08 \times 10^{-3}$ | $s^{-1}$            |
| 49    | $I\kappa B\epsilon \rightarrow \text{sink}$                                                | constitutive $I\kappa B\epsilon$ degradation (free)  | $1.13 \times 10^{-4}$ | $s^{-1}$            |
| 50    | $I\kappa B\epsilon \rightarrow I\kappa B\epsilon_n$ (Import)                               | $I\kappa B\epsilon$ nuclear import                   | $1.5 \times 10^{-4}$  | $s^{-1}$            |
| 51    | $I\kappa B\epsilon_n \rightarrow I\kappa B\epsilon$ (Export)                               | $I\kappa B\epsilon$ nuclear export                   | $1 \times 10^{-4}$    | $s^{-1}$            |
| 52    | $IKK + I\kappa B\alpha - NF-\kappa B \rightarrow IKKI\kappa B\alpha - NF-\kappa B$         | IKK- $I\kappa B\alpha$ NF- $\kappa B$ association    | $1.85 \times 10^{-1}$ | $\mu M^{-1} s^{-1}$ |
| 53    | $IKKI\kappa B\alpha - NF-\kappa B \rightarrow IKK + I\kappa B\alpha - NF-\kappa B$         | IKK- $I\kappa B\alpha$ NF- $\kappa B$ dissociation   | $1.25 \times 10^{-3}$ | $s^{-1}$            |
| 54    | $I\kappa B\alpha_n - NF-\kappa B_n \rightarrow I\kappa B\alpha - NF-\kappa B$ (Export)     | $I\kappa B\alpha - NF-\kappa B$ nuclear export       | $1.38 \times 10^{-2}$ | $s^{-1}$            |
| 55    | $IKK + I\kappa B\beta - NF-\kappa B \rightarrow IKKI\kappa B\beta - NF-\kappa B$           | IKK- $I\kappa B\beta$ NF- $\kappa B$ association     | $4.8 \times 10^{-2}$  | $\mu M^{-1} s^{-1}$ |
| 56    | $IKKI\kappa B\beta - NF-\kappa B \rightarrow IKK + I\kappa B\beta - NF-\kappa B$           | IKK- $I\kappa B\beta$ NF- $\kappa B$ dissociation    | $1.75 \times 10^{-3}$ | $s^{-1}$            |
| 57    | $I\kappa B\beta_n - NF-\kappa B_n \rightarrow I\kappa B\beta - NF-\kappa B$ (Export)       | $I\kappa B\beta - NF-\kappa B$ nuclear export        | $5.2 \times 10^{-3}$  | $s^{-1}$            |
| 58    | $IKK + I\kappa B\epsilon - NF-\kappa B \rightarrow IKKI\kappa B\epsilon - NF-\kappa B$     | IKK- $I\kappa B\epsilon$ NF- $\kappa B$ association  | $7.0 \times 10^{-2}$  | $\mu M^{-1} s^{-1}$ |
| 59    | $IKKI\kappa B\epsilon - NF-\kappa B \rightarrow IKK + I\kappa B\epsilon - NF-\kappa B$     | IKK- $I\kappa B\epsilon$ NF- $\kappa B$ dissociation | $1.75 \times 10^{-3}$ | $s^{-1}$            |
| 60    | $I\kappa B\epsilon_n - NF-\kappa B_n \rightarrow I\kappa B\epsilon - NF-\kappa B$ (Export) | $I\kappa B\epsilon - NF-\kappa B$ nuclear export     | $5.2 \times 10^{-3}$  | $s^{-1}$            |
| 61    | $IKK \rightarrow \text{sink}$                                                              | Slow adaptation                                      | $1.2 \times 10^{-4}$  | $s^{-1}$            |
| 62    | $IKKI\kappa B\alpha \rightarrow IKK$                                                       | IKK- $I\kappa B\alpha$ catalysis                     | $4.07 \times 10^{-3}$ | $s^{-1}$            |
| 63    | $IKKI\kappa B\beta \rightarrow IKK$                                                        | IKK- $I\kappa B\beta$ catalysis                      | $1.5 \times 10^{-3}$  | $s^{-1}$            |
| 64    | $IKKI\kappa B\epsilon \rightarrow IKK$                                                     | IKK- $I\kappa B\epsilon$ catalysis                   | $2.2 \times 10^{-3}$  | $s^{-1}$            |

### Concentration profiles of the 24 species in the NF- $\kappa B$ signalling pathway

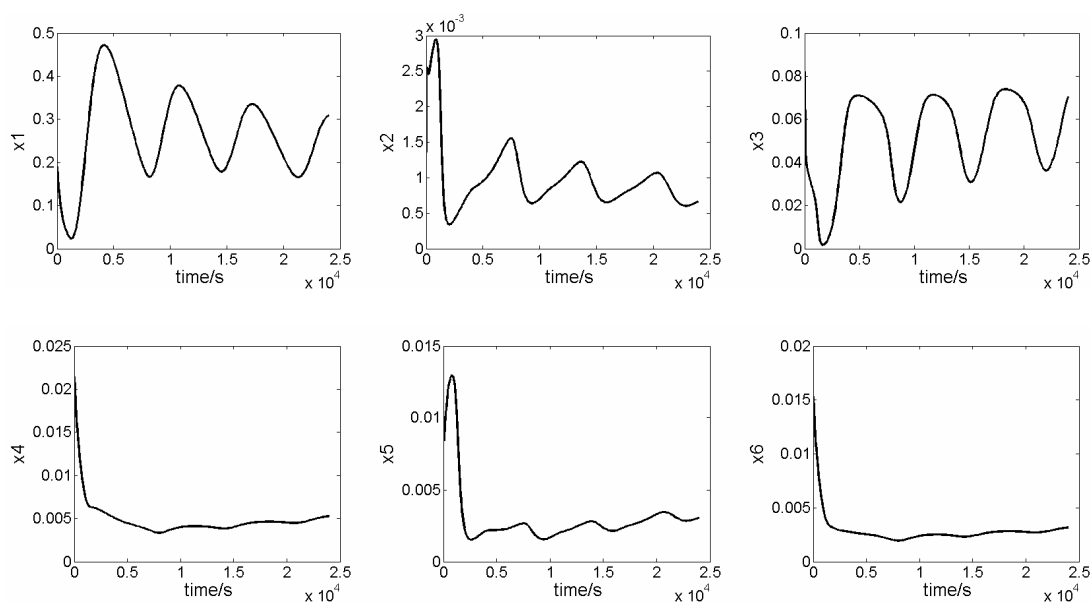

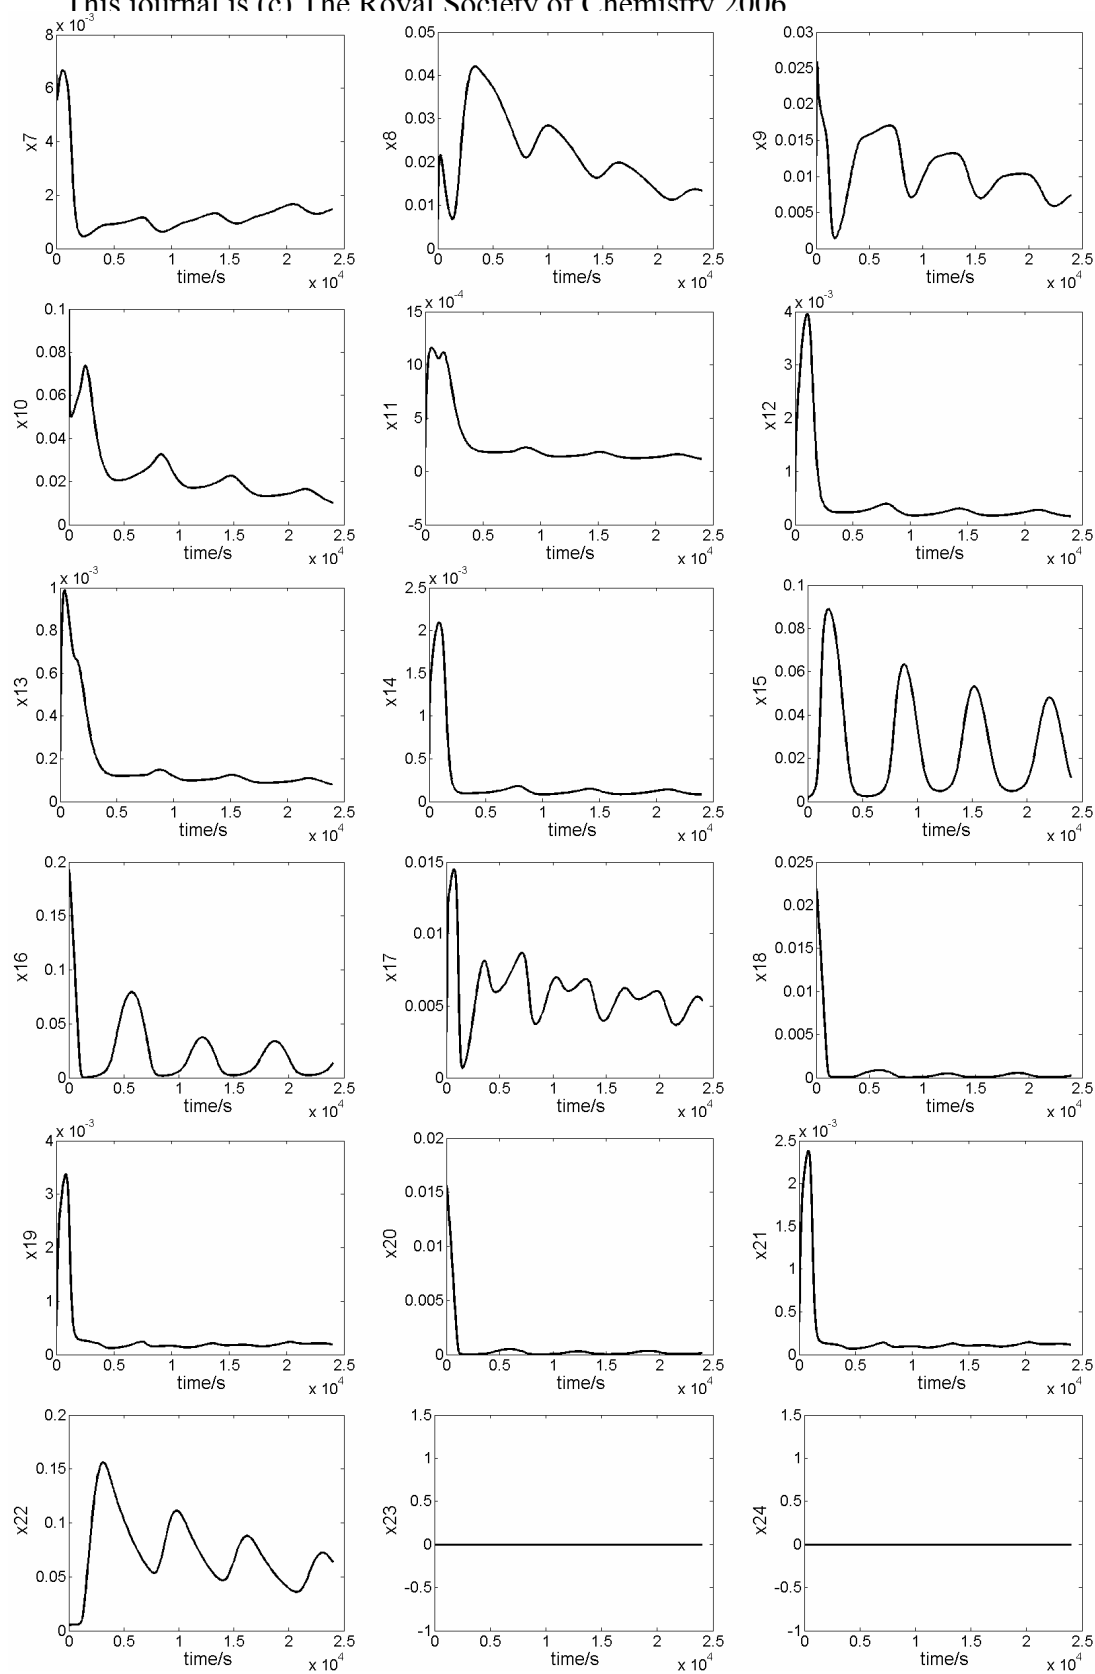

Fig.A1 Concentration profiles of the reaction species in the NF- $\kappa$ B model

### Orthogonal procedure for identifiability analysis

1. Calculate the magnitude of each column of  $\bar{S}$  by the Euclidean norm  
**Error! Reference source not found.** The parameter corresponding to the column with maximum magnitude is the first identifiable parameter. This column is marked as  $X_L (L=1)$ .

2. Formulate the residual matrix:

$$R_L = (I - X_L(X_L^T X_L)^{-1} X_L^T) \bar{S} \quad (1)$$

This removes the information contained in the selected columns and also the portion of information contained in the remaining columns that is linearly correlated with the selected columns.

3. Calculate the magnitude of the each column of  $R_L$ . The column with the largest magnitude corresponds to the next identifiable parameter because it has the largest effect on the response variables of all the remaining parameters, which is not correlated with the effects of the selected set of parameters.

4. Augment  $X_L$  with the column of  $\bar{S}$  corresponding to this parameter. The augmented matrix is denoted as  $X_{L+1}$ .

5. Increase the iteration counter by 1 and repeat steps 2-4 for all parameters or until the maximum magnitude of the columns of  $R_L$  is less than a pre-specified threshold.
